# Supplementary material
Source: publisher figshare collection journal article supplement (https://acs.figshare.com/ndownloader/files/15577880)

## Supporting information

# Philanthotoxin analogues that selectively inhibit ganglionic nicotinic acetylcholine receptors with exceptional potency

*Hamid S Kachel<sup>a,c</sup>, Henrik Franzyk<sup>b</sup> and Ian R Mellor<sup>a</sup>*

<sup>a</sup>School of Life Sciences, University of Nottingham, University Park, Nottingham, NG7 2RD, UK.

<sup>b</sup>Department of Drug Design and Pharmacology, University of Copenhagen, Jagtvej 162, DK-2100 Copenhagen, Denmark.

**Corresponding author:** Ian R Mellor, School of Life Sciences, University of Nottingham, University Park, Nottingham, NG7 2RD, UK. [ian.mellor@nottingham.ac.uk](mailto:ian.mellor@nottingham.ac.uk)

**Present Address:** School of Life Science, Biology Department, University of Zakho, Duhok, Kurdistan Region, Iraq.

### Contents

p. S2-S19: Characterization of PhTX analogues

## Characterization of PhTX analogues

Compound **5**:  $t_R = 18.56$  min (purity: >99.9%). Gradient: 0  $\rightarrow$  100% B over 30 min; B = 95% MeCN + 0.1% TFA. HRMS:  $C_{26}H_{45}N_5O_3$   $[M + H]^+$  476.36007, found 476.36000;  $\Delta M = 0.1$  ppm

Analyt. HPLC chromatogram:

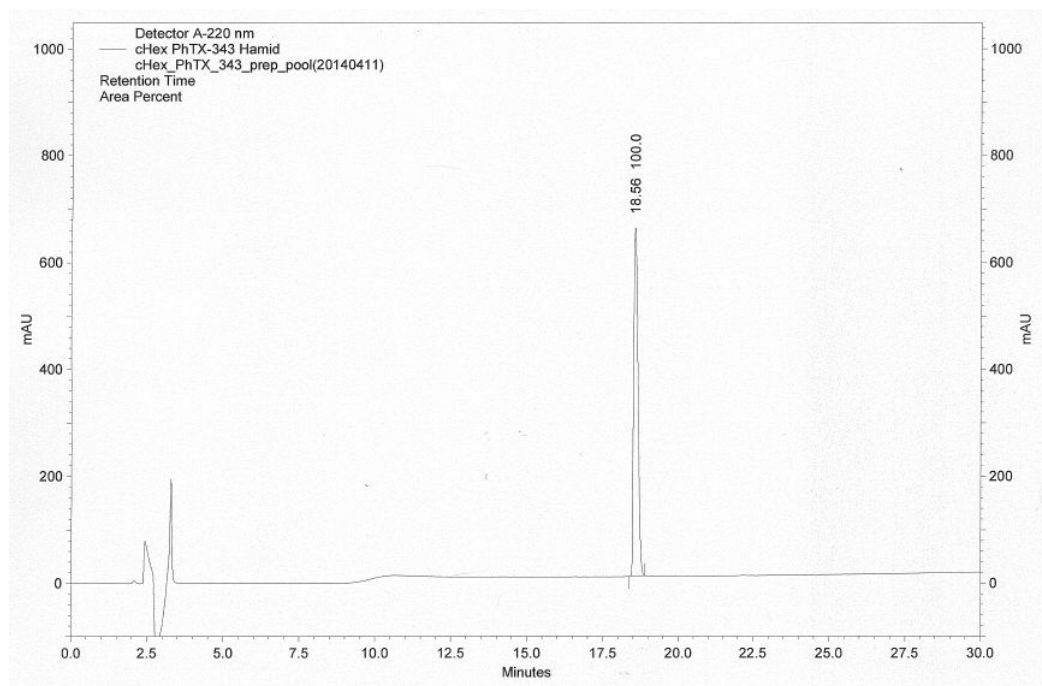

$^{13}C$  NMR spectrum (150 MHz, methanol- $d_4$ ):

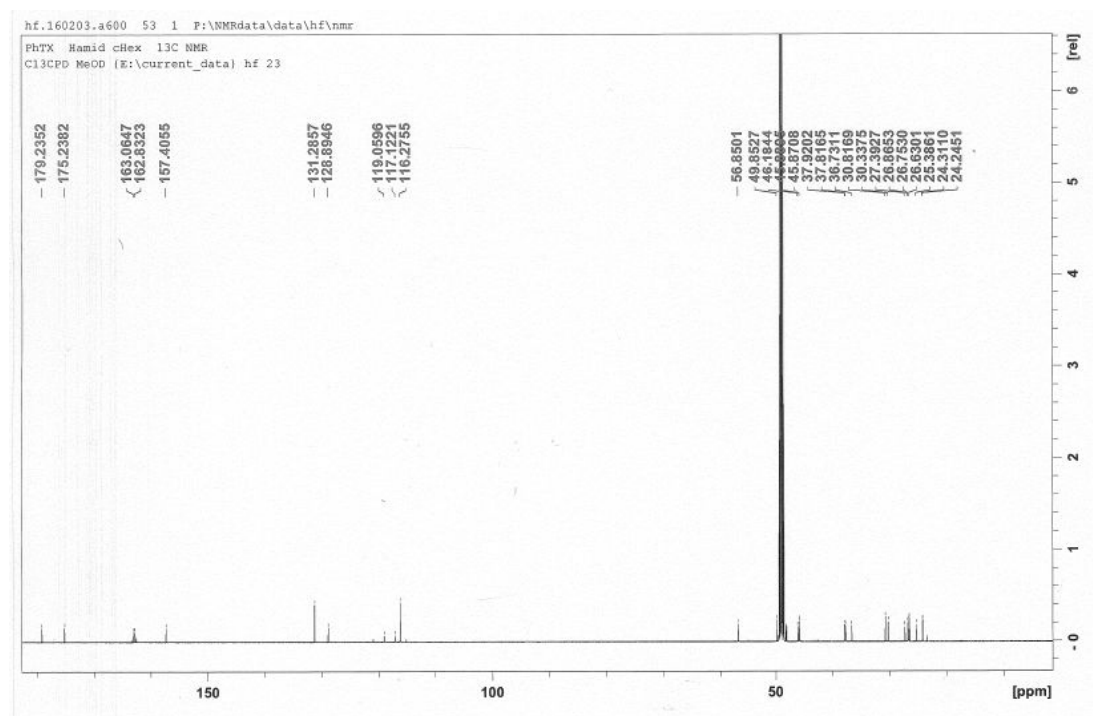

Supporting information

Compound **5**:

$^1\text{H}$  NMR spectrum (600 MHz, methanol- $d_4$ ):

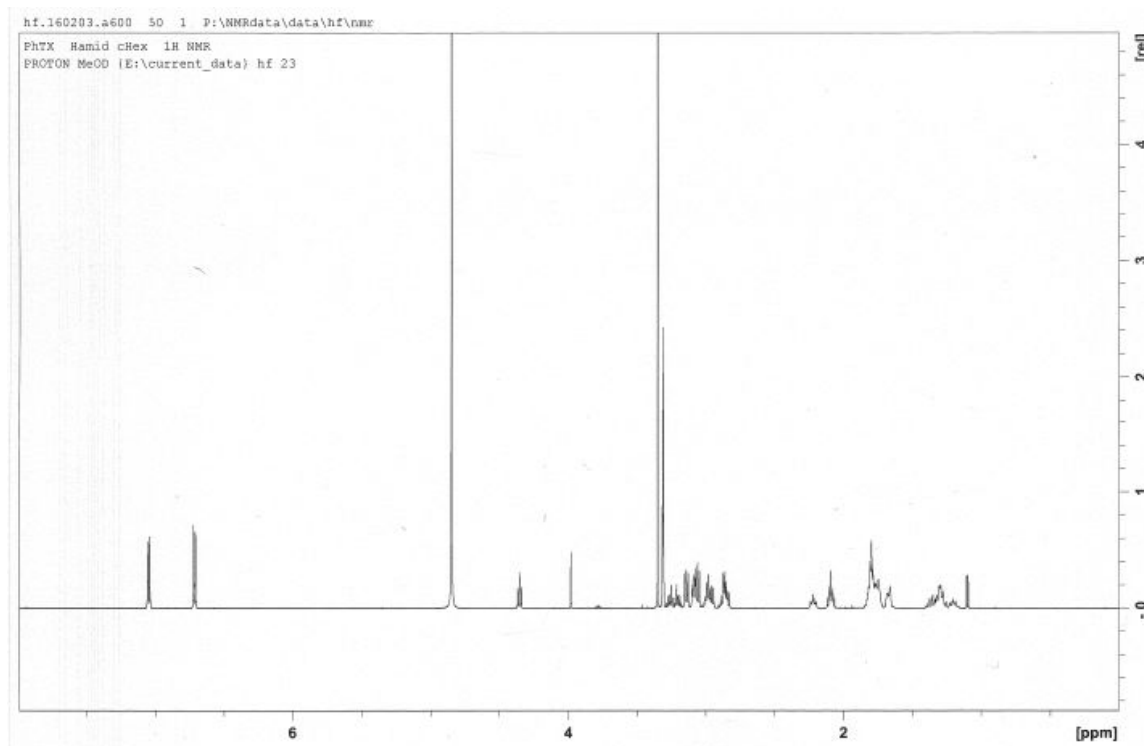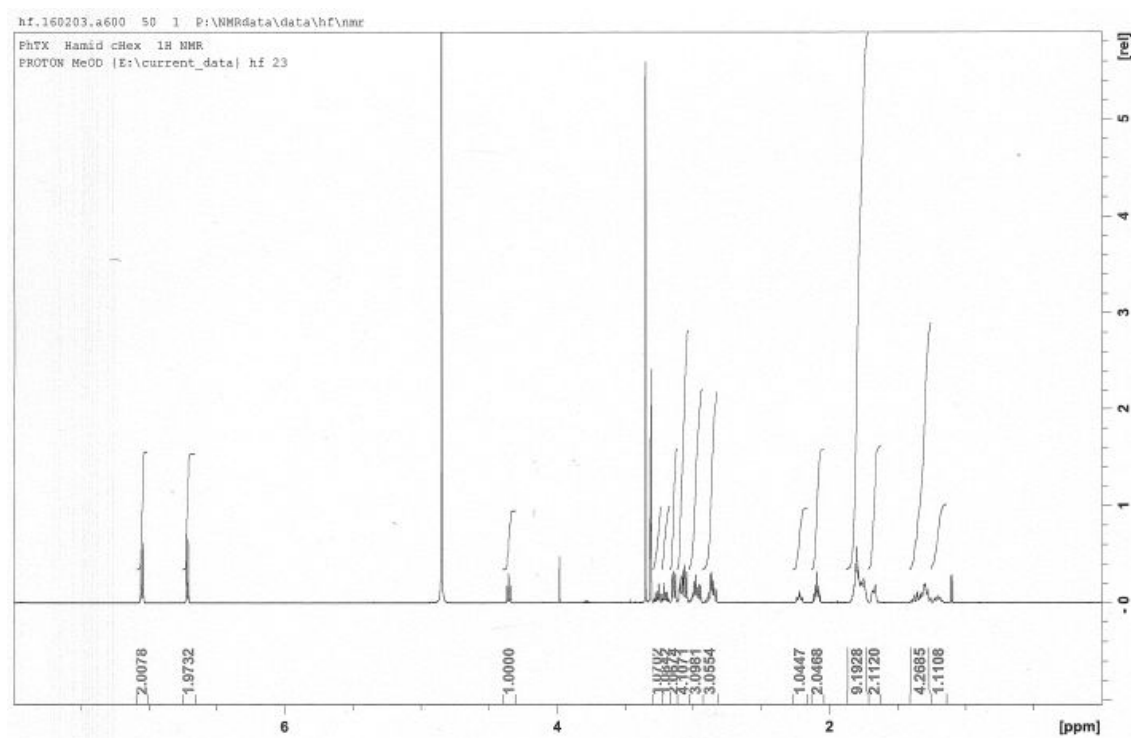

Supporting information

Compound **6**:  $t_R = 16.98$  min (purity: 99.4%). Gradient: 0  $\rightarrow$  100% B over 30 min; B = 95% MeCN + 0.1% TFA. HRMS: calcd for  $C_{25}H_{43}N_5O_3$   $[M + H]^+$  462.34442, found 462.34432;  $\Delta M = 0.2$  ppm.

Analyt. HPLC chromatogram:

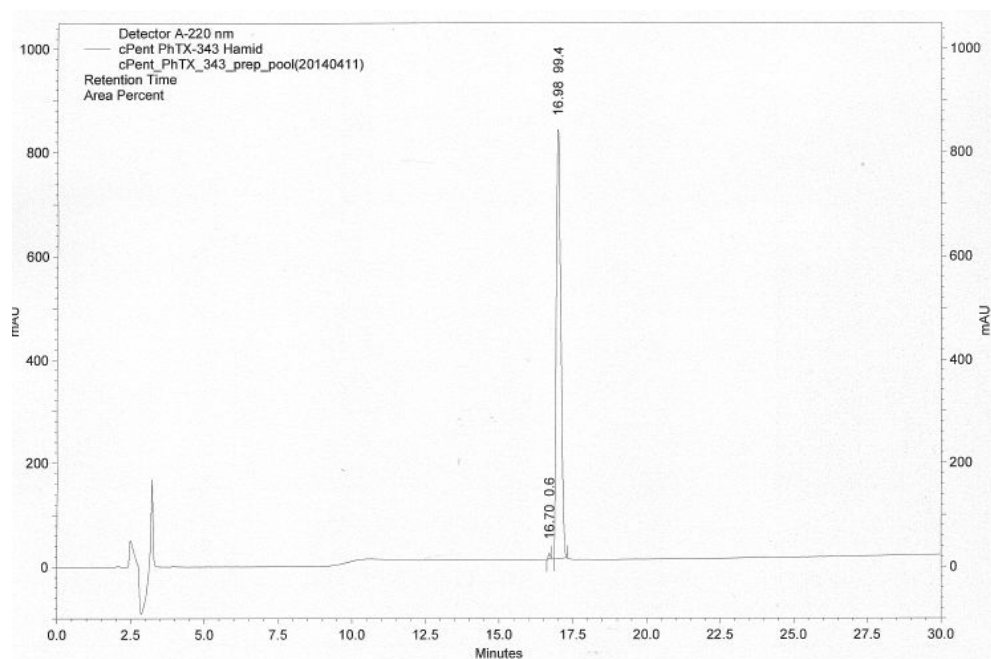

$^{13}C$  NMR spectrum (150 MHz, methanol- $d_4$ ):

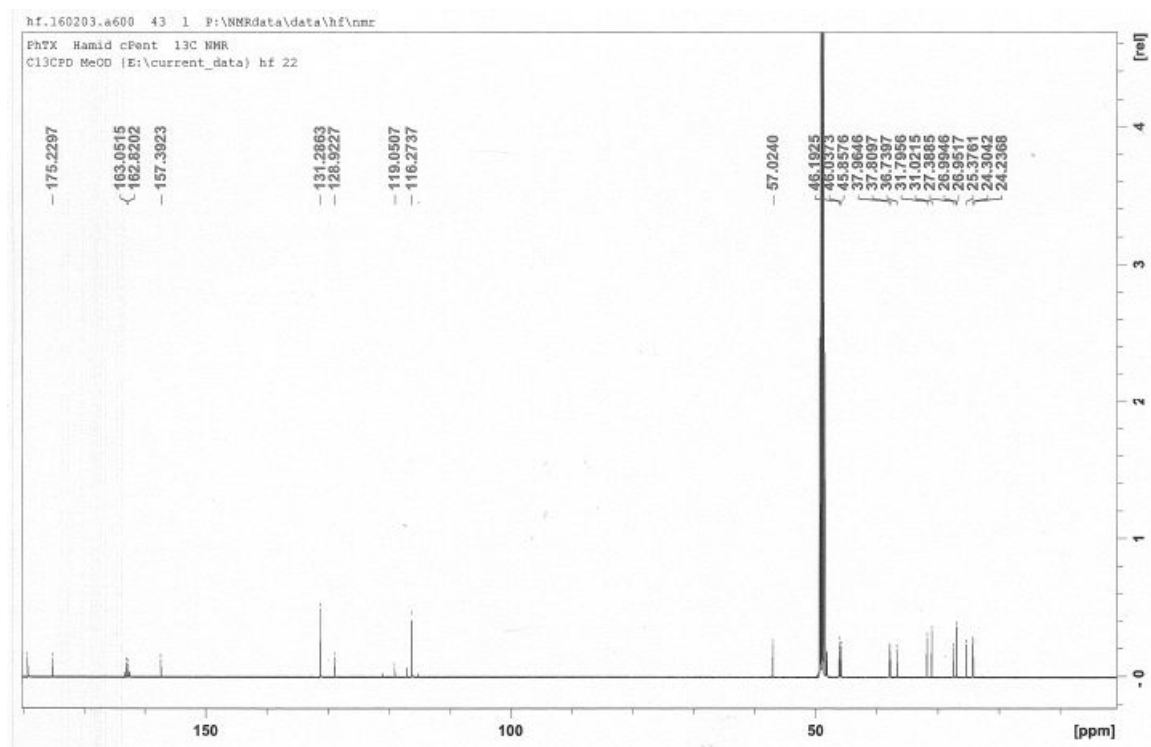

Compound **6**:

$^1\text{H}$  NMR spectrum (600 MHz, methanol- $d_4$ ):

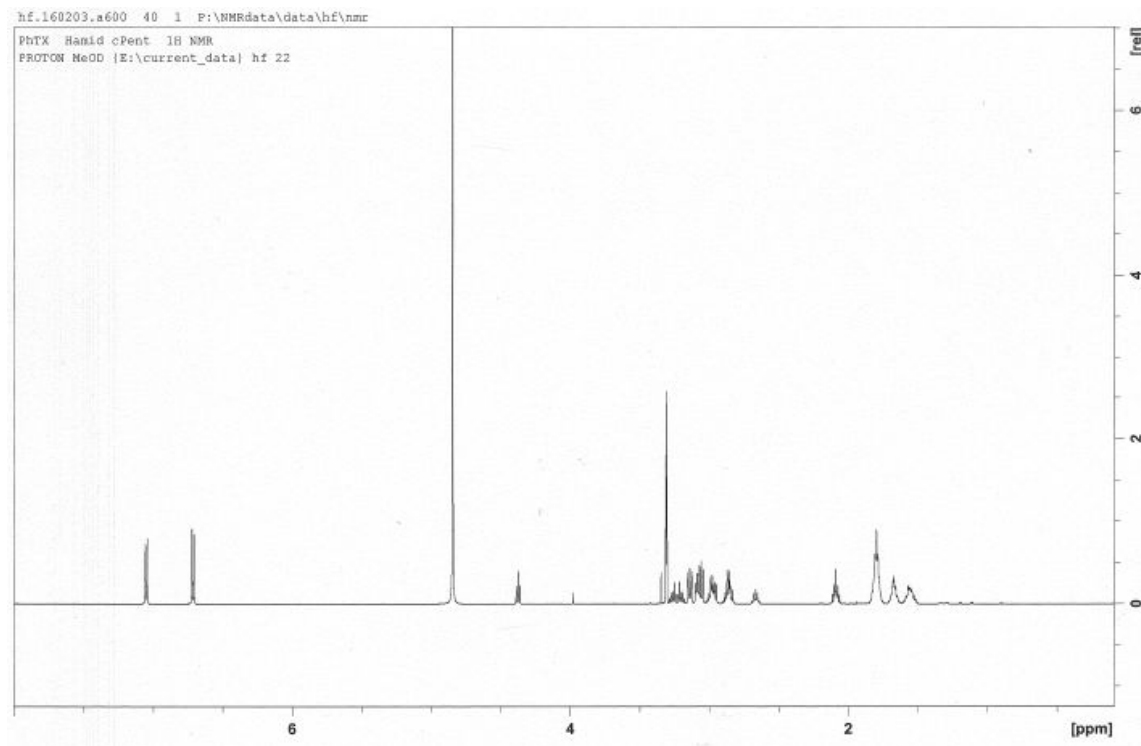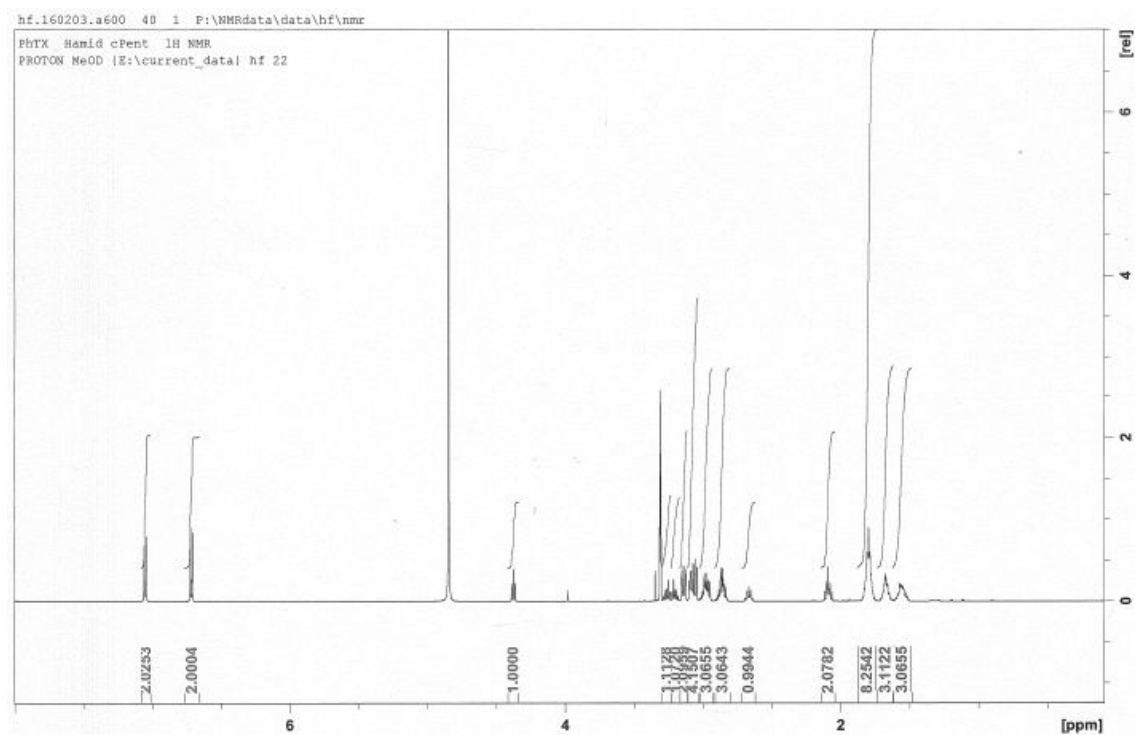

Supporting information

Compound **10**:  $t_R = 15.45$  min (purity: >99.9%). Gradient: 0 → 100% B over 30 min; B = 95% MeCN + 0.1% TFA. HRMS: calcd for  $C_{24}H_{47}N_5O$   $[M + H]^+$  438.38025, found 438.38004;  $\Delta M = 0.4$  ppm.

Analyt. HPLC chromatogram:

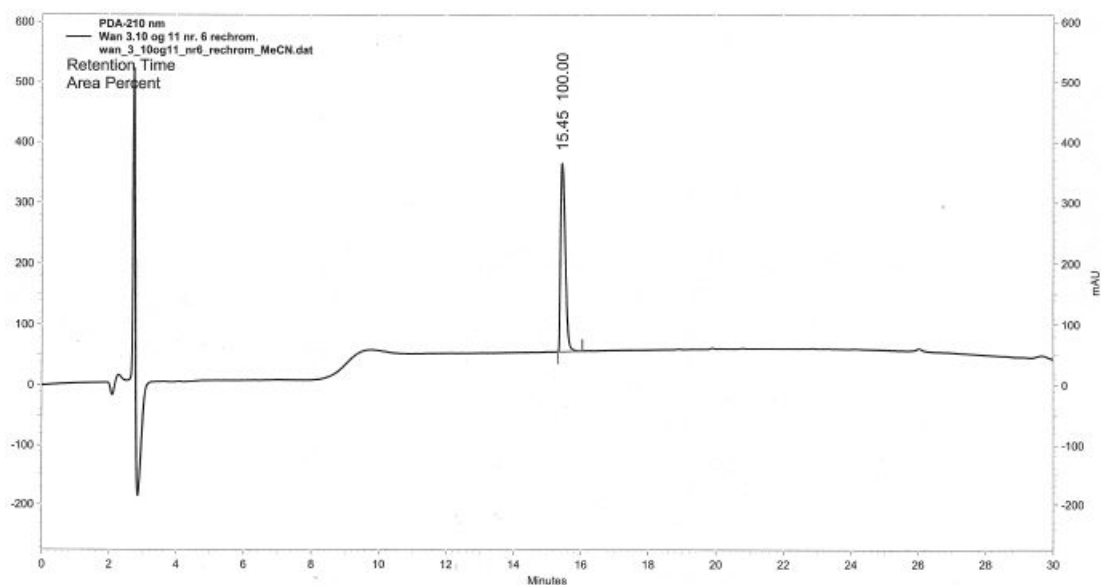

$^{13}C$  NMR spectrum (150 MHz, methanol- $d_4$ ):

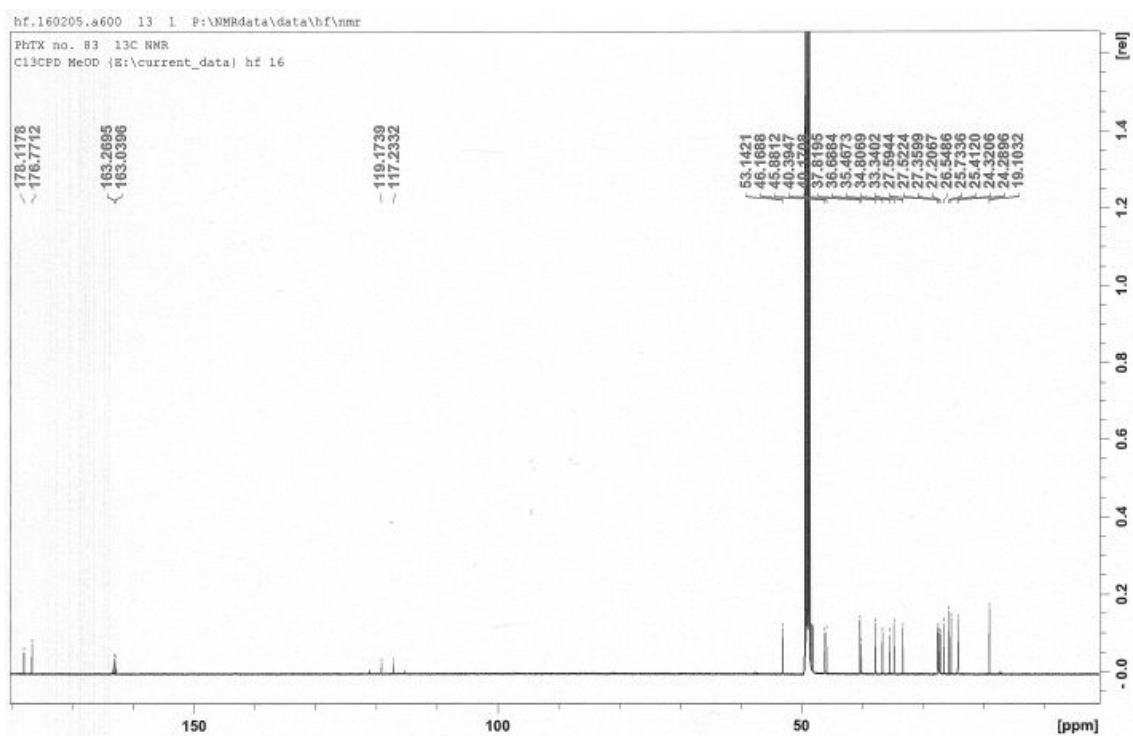

Compound **10**:

$^1\text{H}$  NMR spectrum (600 MHz, methanol- $d_4$ ):

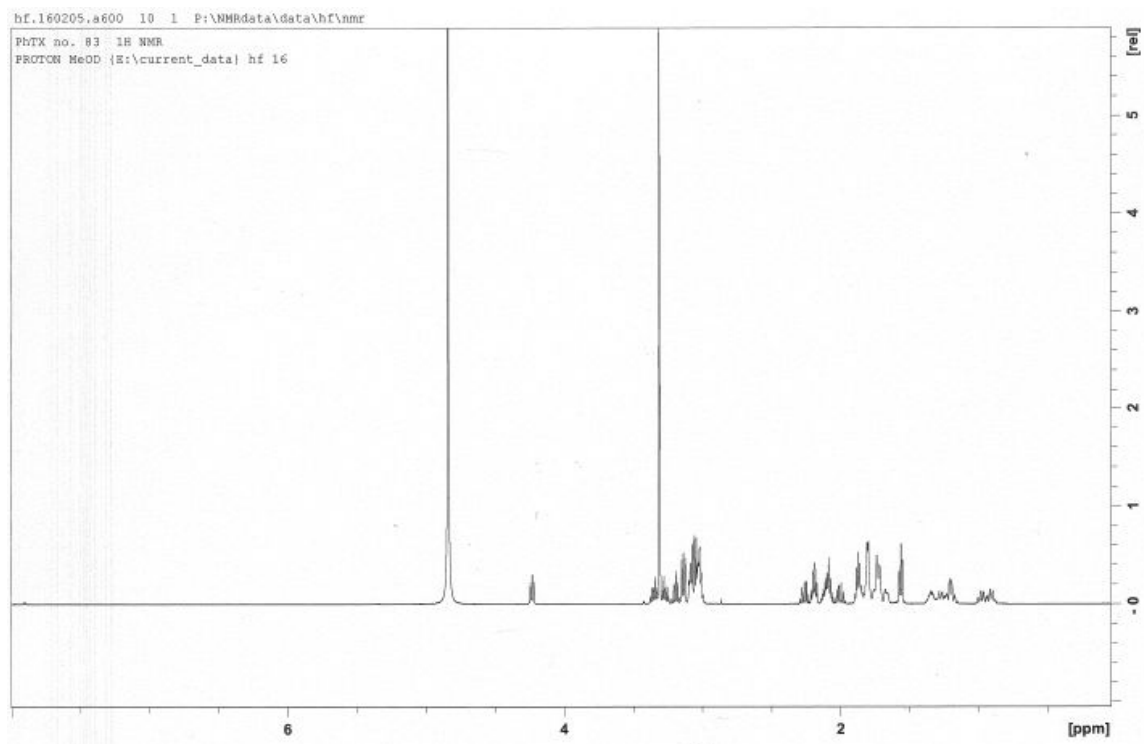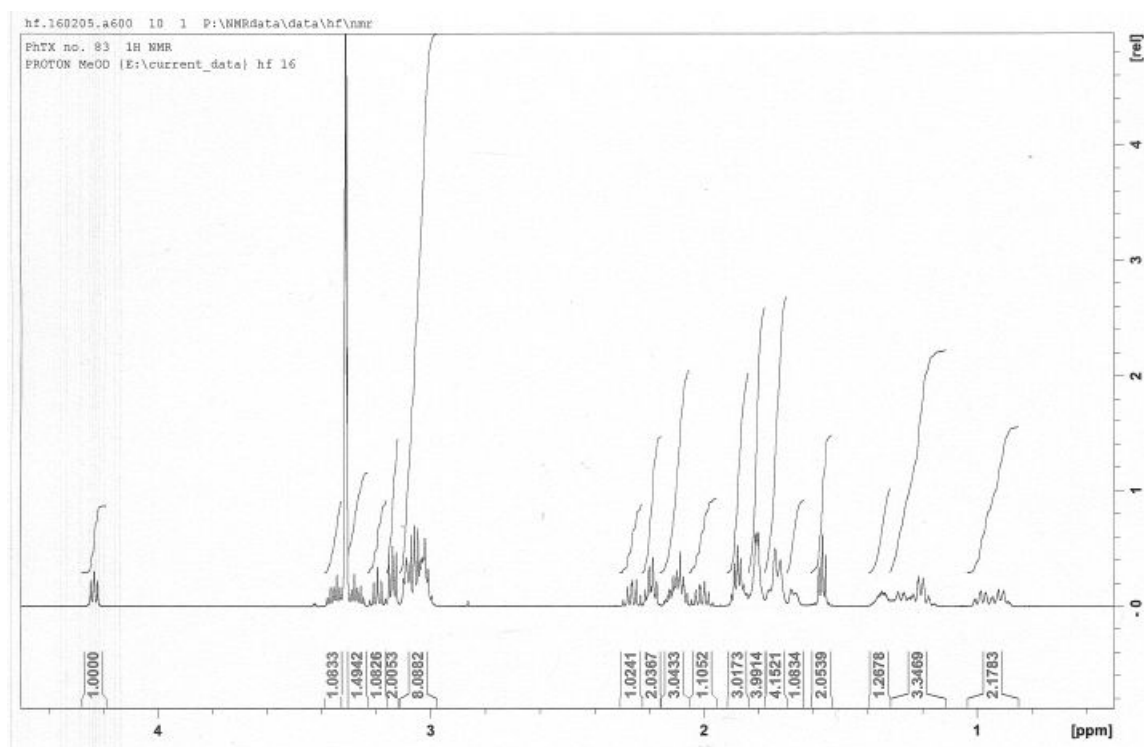

Supporting information



Compound **11**:  $t_R = 16.91$  min (purity: 99.3%). Gradient: 0  $\rightarrow$  100% B over 30 min; B = 95% MeCN + 0.1% TFA. HRMS: calcd for  $C_{25}H_{49}ON_5O_2$   $[M + H]^+$  452.39590, found 452.39581;  $\Delta M = 0.1$  ppm.

Analyt. HPLC chromatogram:

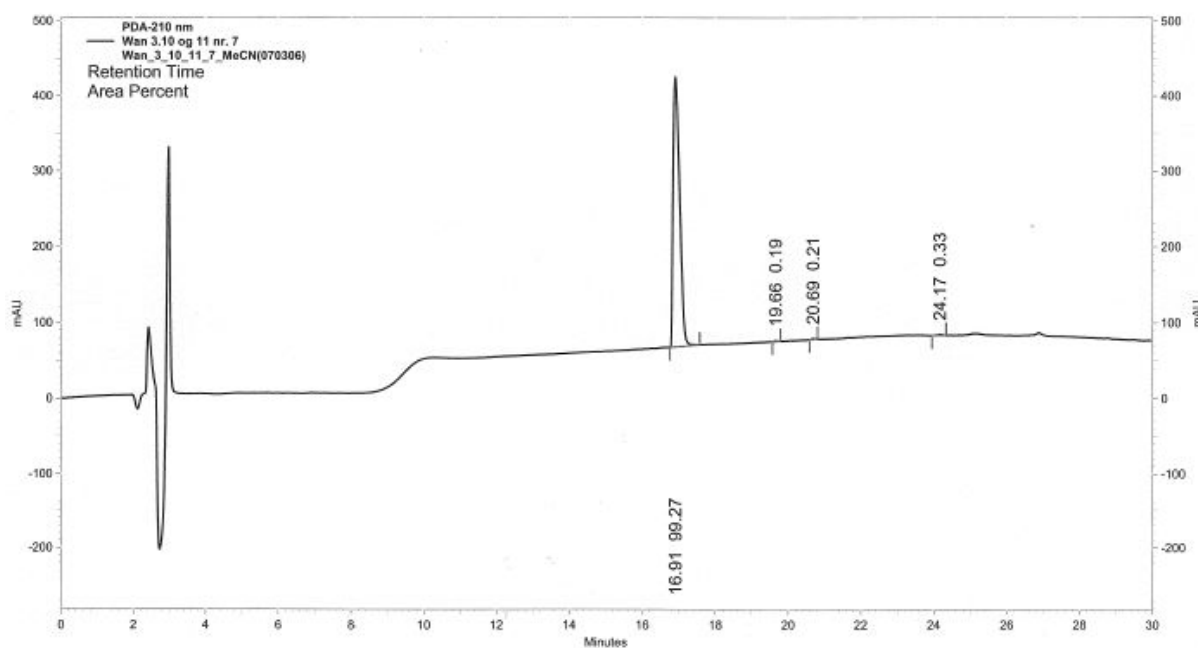

$^{13}C$  NMR spectrum (150 MHz, methanol- $d_4$ ):

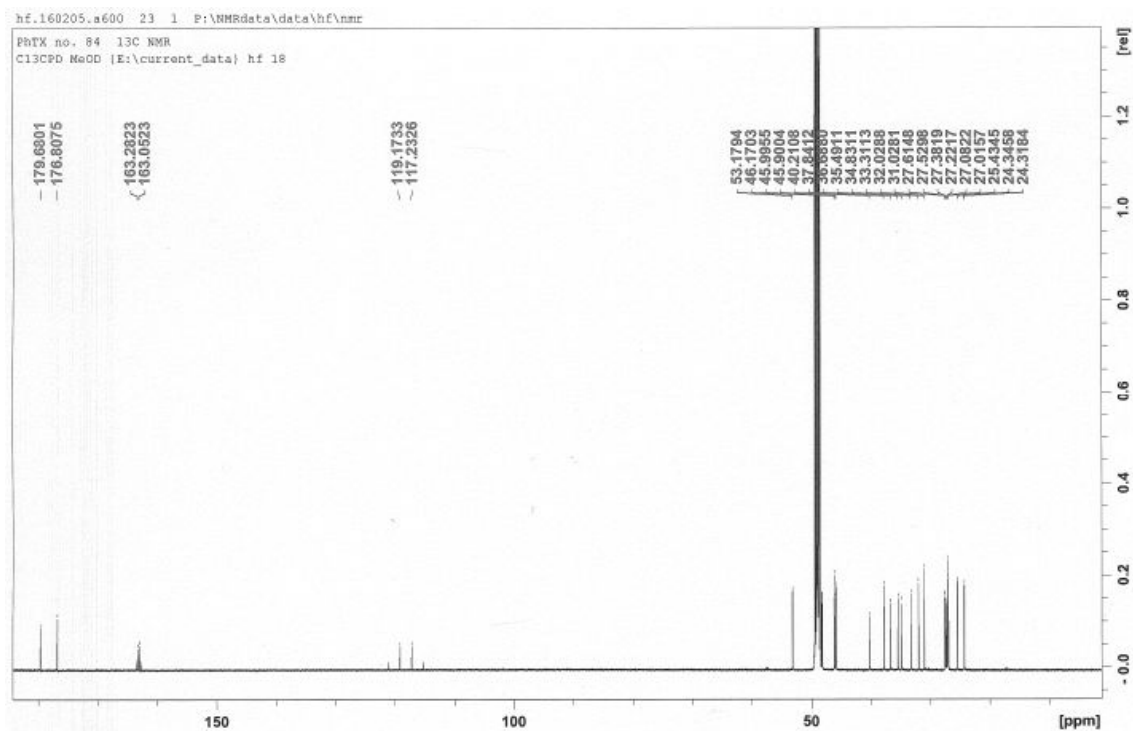

Supporting information



Compound 11:

$^1\text{H}$  NMR spectrum (600 MHz, methanol- $d_4$ ):

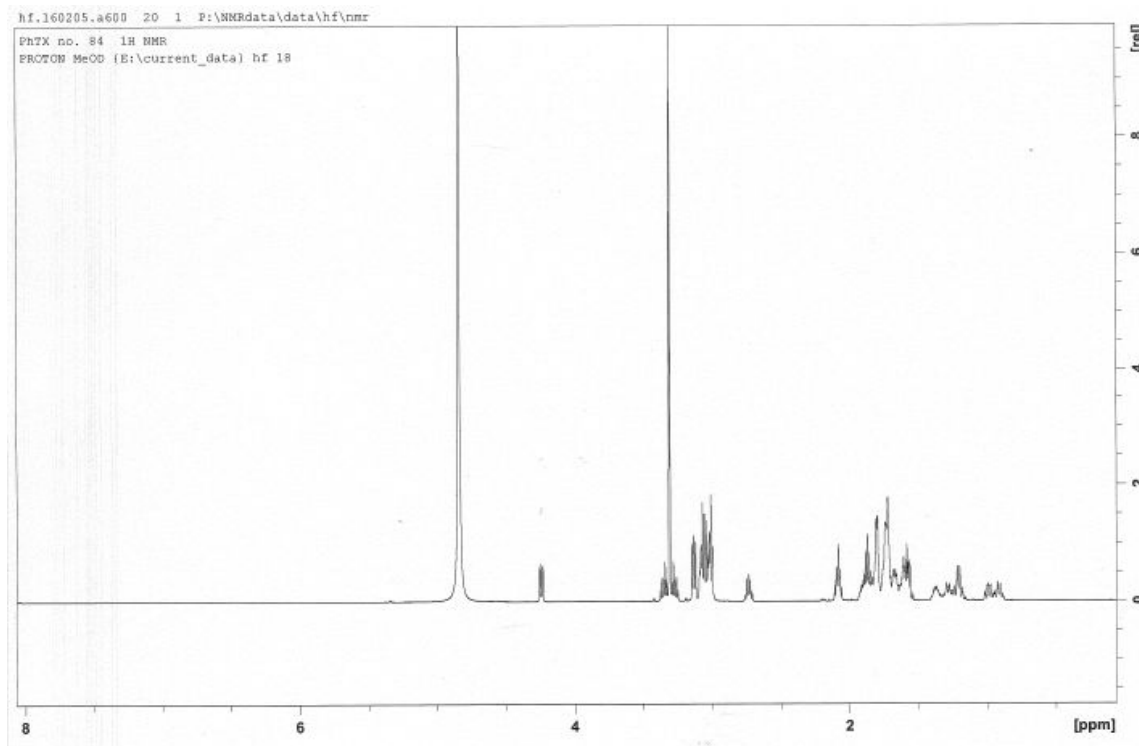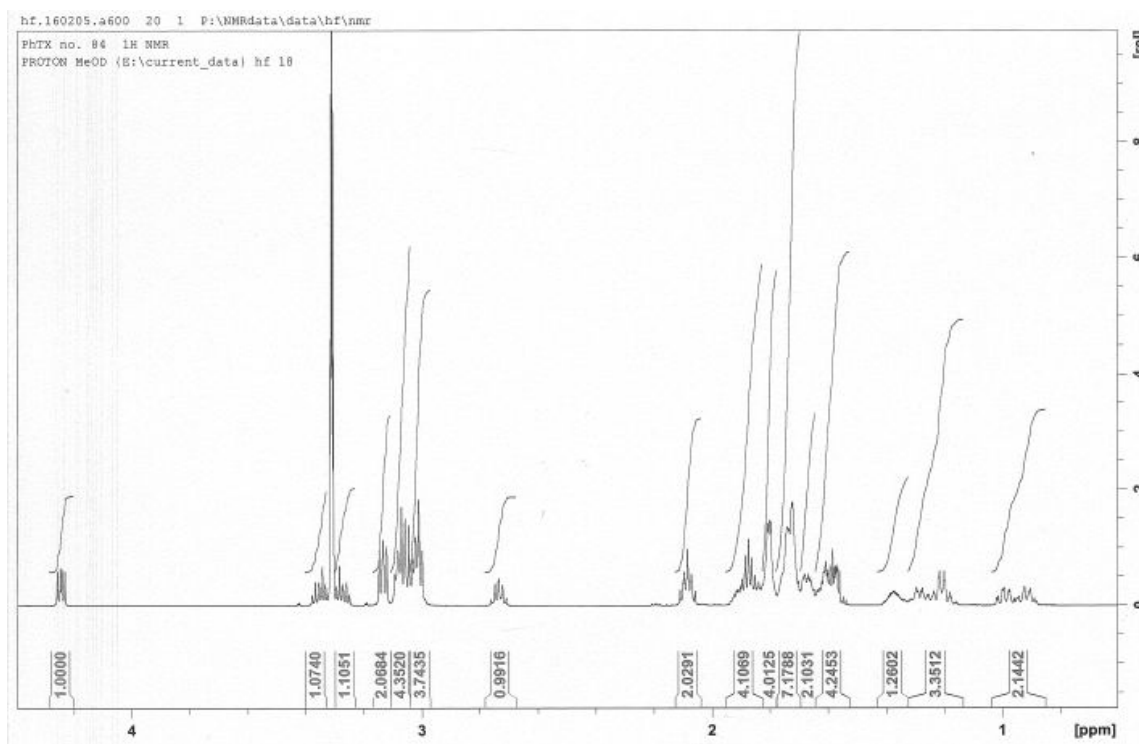

Supporting information

Compound **13**:  $t_R = 18.67$  min (purity: 97.2%). Gradient: 0  $\rightarrow$  100% B over 30 min; B = 95% MeCN + 0.1% TFA. HRMS: calcd for  $C_{27}H_{54}N_5O_2$   $[M + H]^+$  480.42720, found 480.42715;  $\Delta M = 0.3$  ppm.

Analyt. HPLC chromatogram:

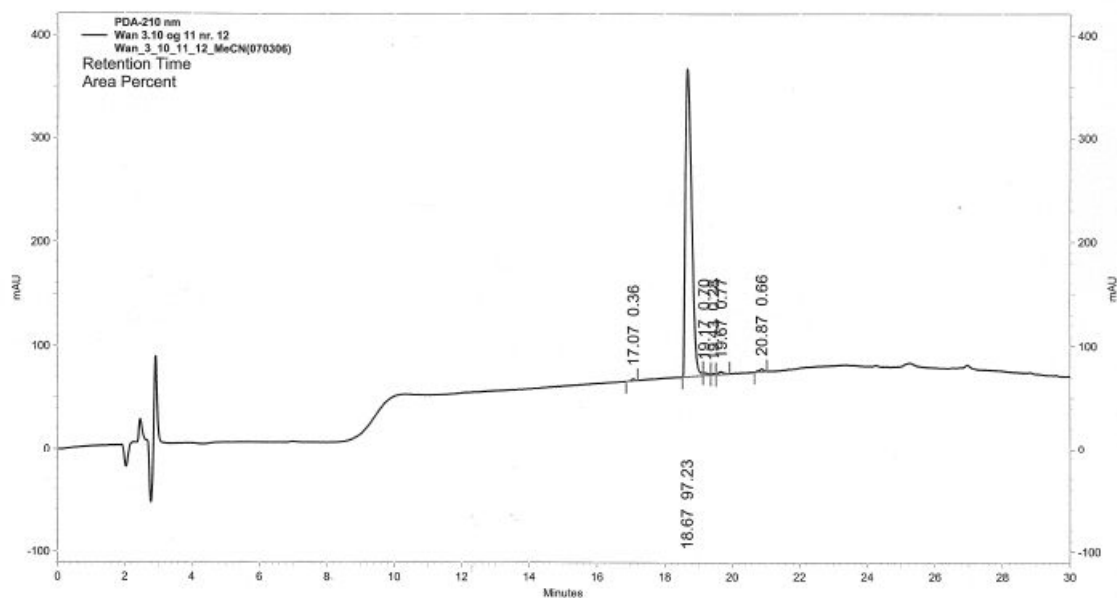

$^{13}C$  NMR spectrum (150 MHz, methanol- $d_4$ ):

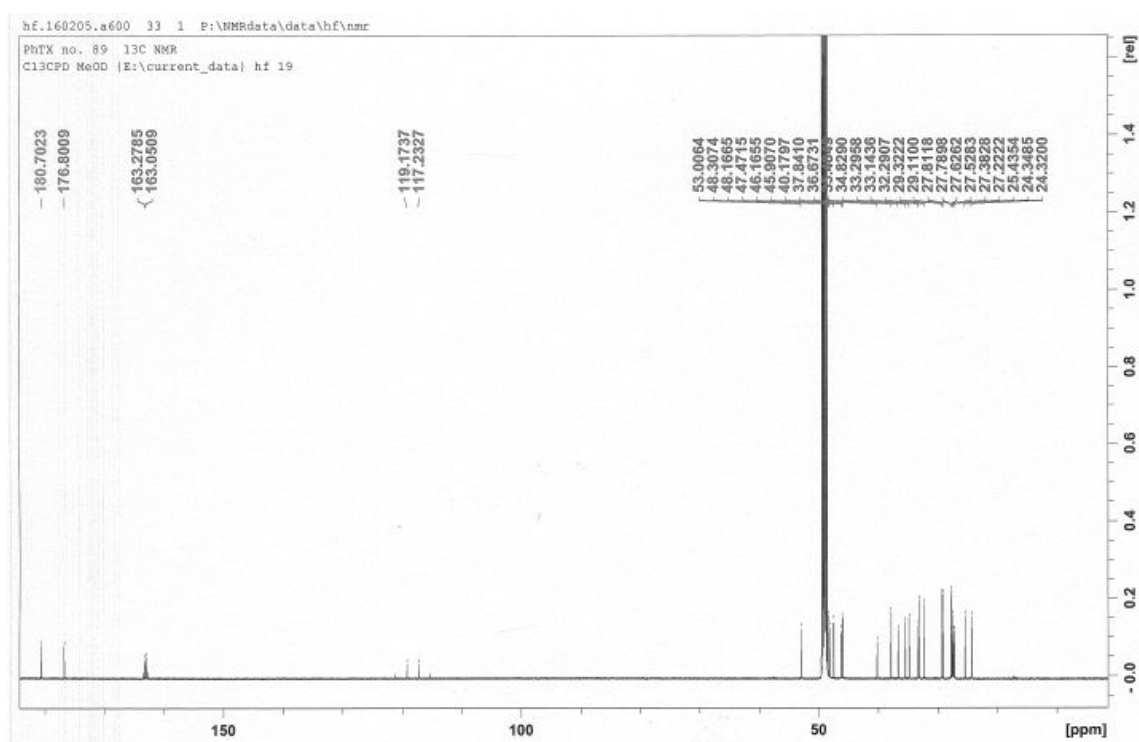

Compound 13:

$^1\text{H}$  NMR spectrum (600 MHz, methanol- $d_4$ ):

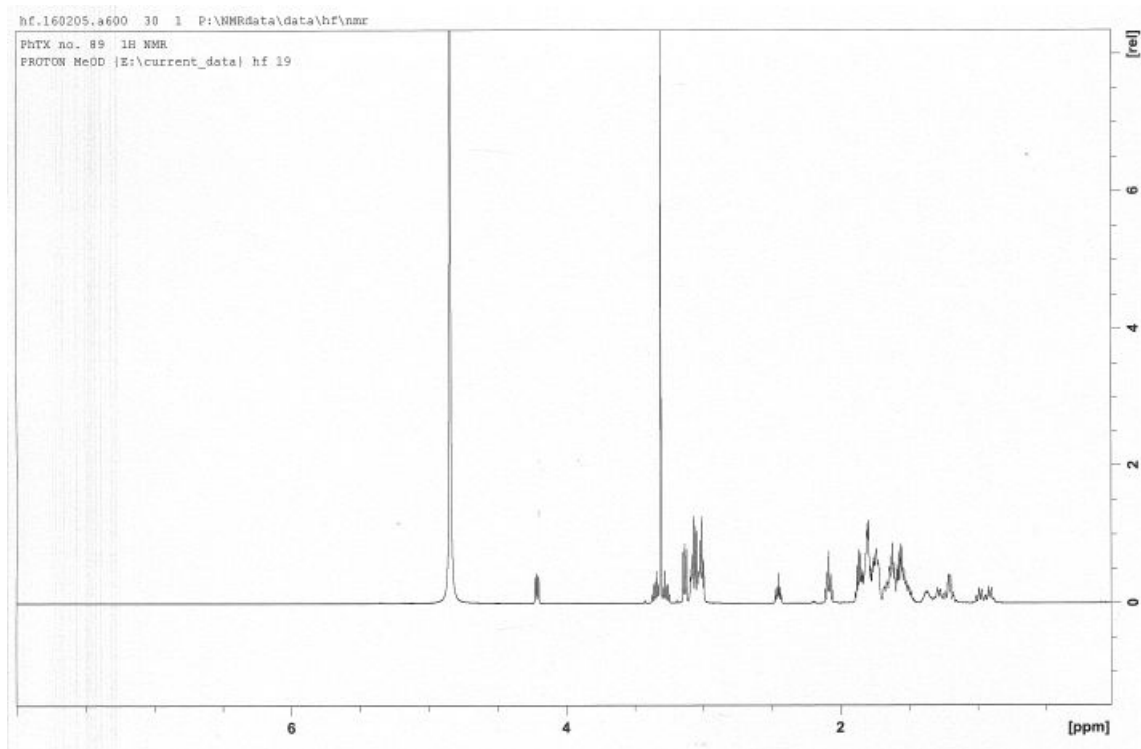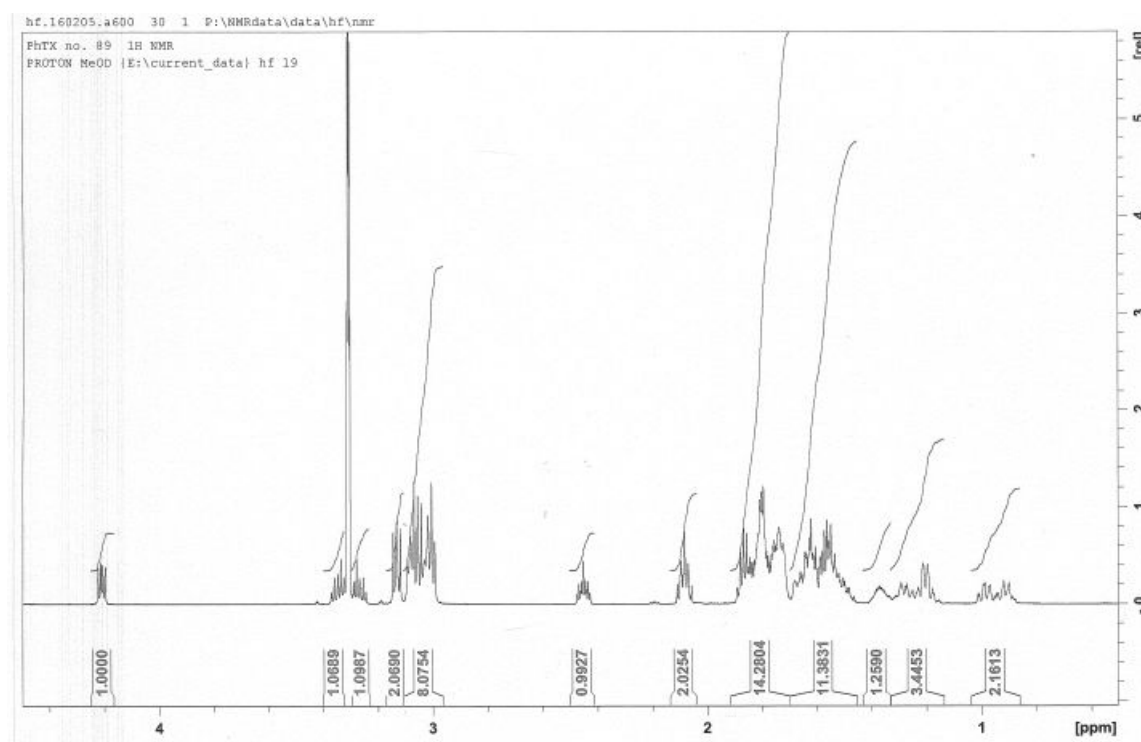

Supporting information

Compound **14**:  $t_R = 19.17$  min (purity: 99.2%). Gradient: 0  $\rightarrow$  100% B over 30 min; B = 95% MeCN + 0.1% TFA. HRMS: calcd for  $C_{28}H_{54}N_5O_2$   $[M + H]^+$  492.42729, found 492.42708;  $\Delta M = 0.4$  ppm.

Analyt. HPLC chromatogram:

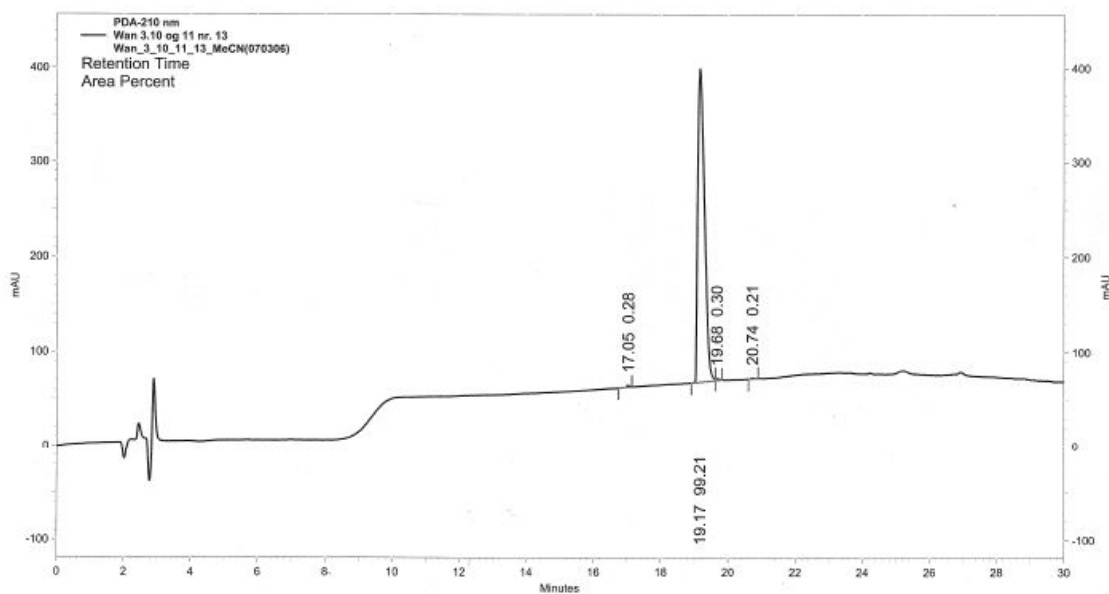

$^{13}C$  NMR spectrum (150 MHz, methanol- $d_4$ ):

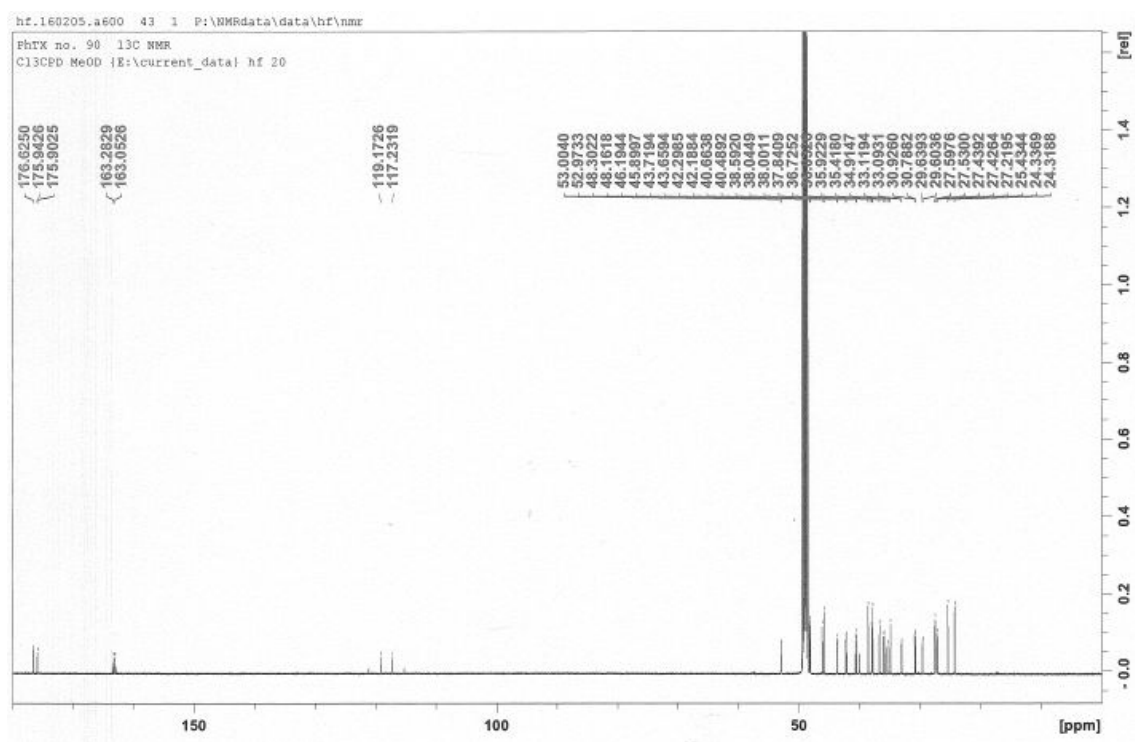

Compound **14**:

$^1\text{H}$  NMR spectrum (600 MHz, methanol- $d_4$ ):

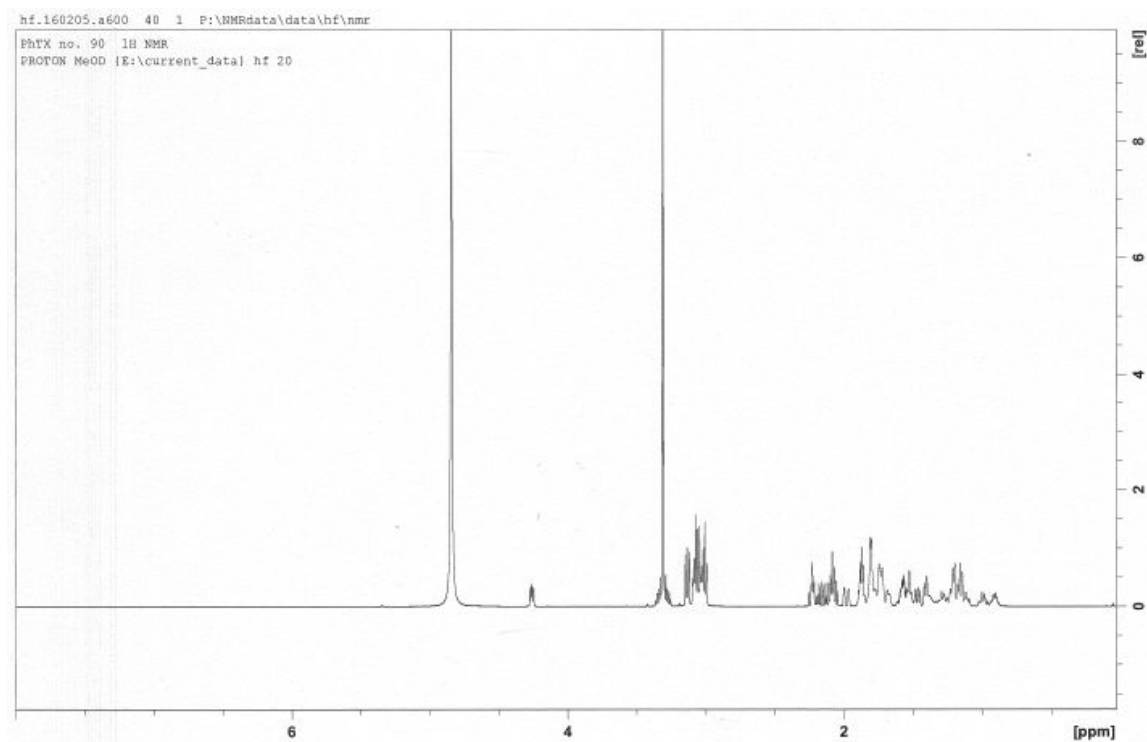

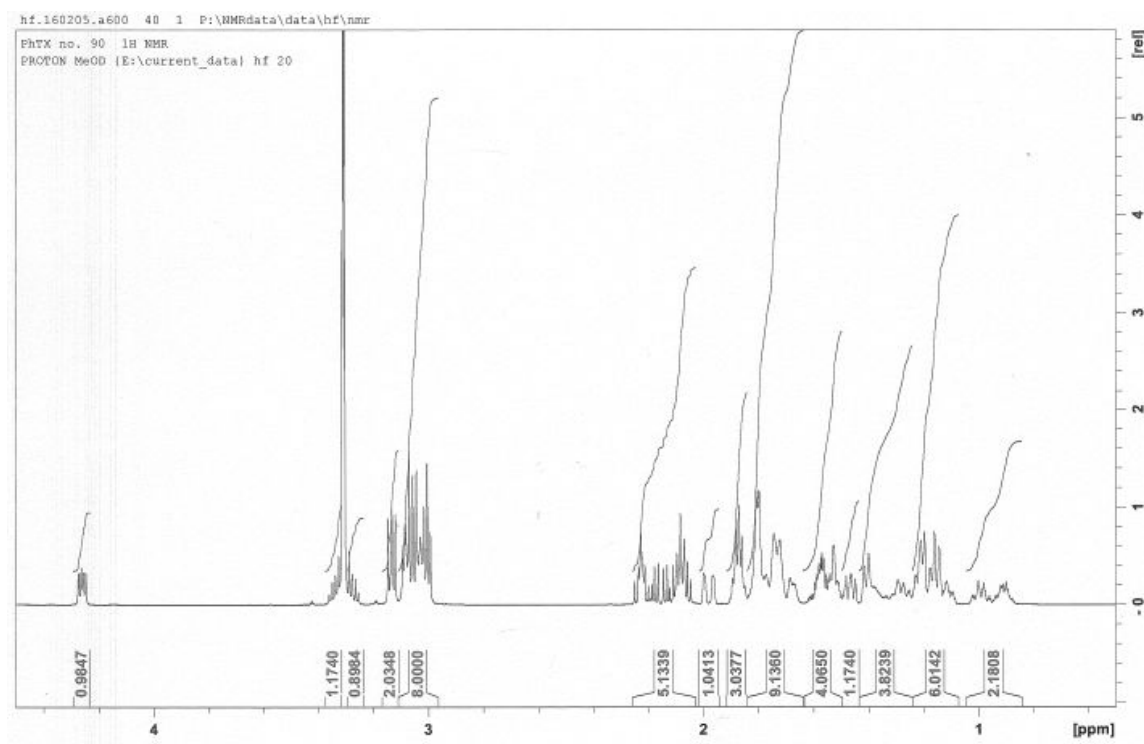

Compound **15**:  $t_R = 17.11$  min (purity: 99.8%). Gradient: 0  $\rightarrow$  100% B over 30 min; B = 95% MeCN + 0.1% TFA. HRMS: calcd for  $C_{26}H_{46}N_5O_2$   $[M + H]^+$  460.36460, found 460.36446;  $\Delta M = 0.3$  ppm.

Analyt. HPLC chromatogram:

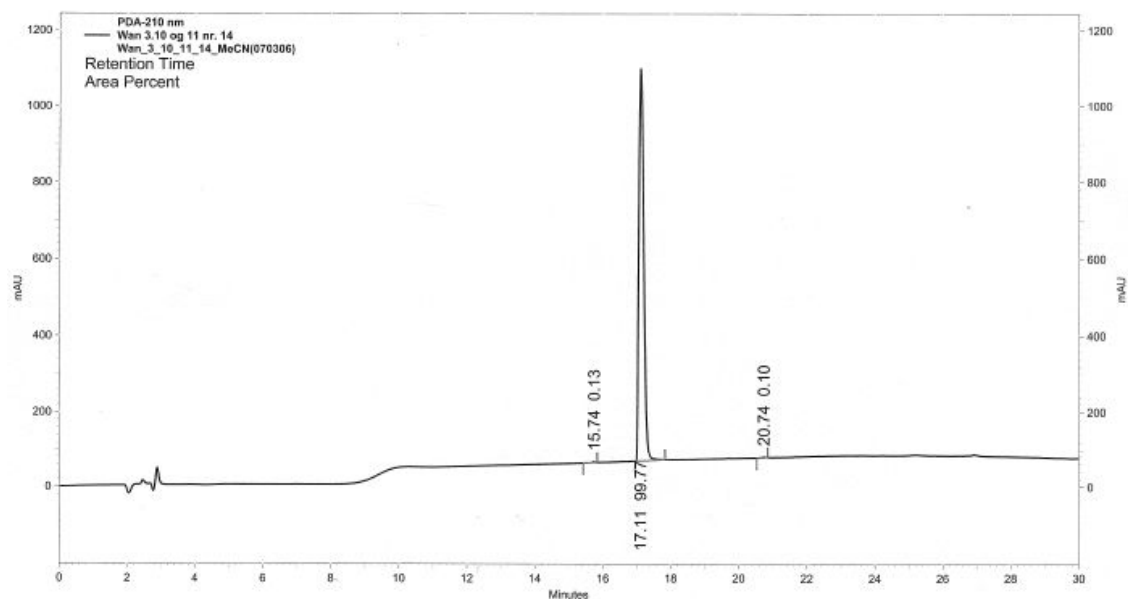

$^{13}\text{C}$  NMR spectrum (150 MHz, methanol- $\text{d}_4$ ):

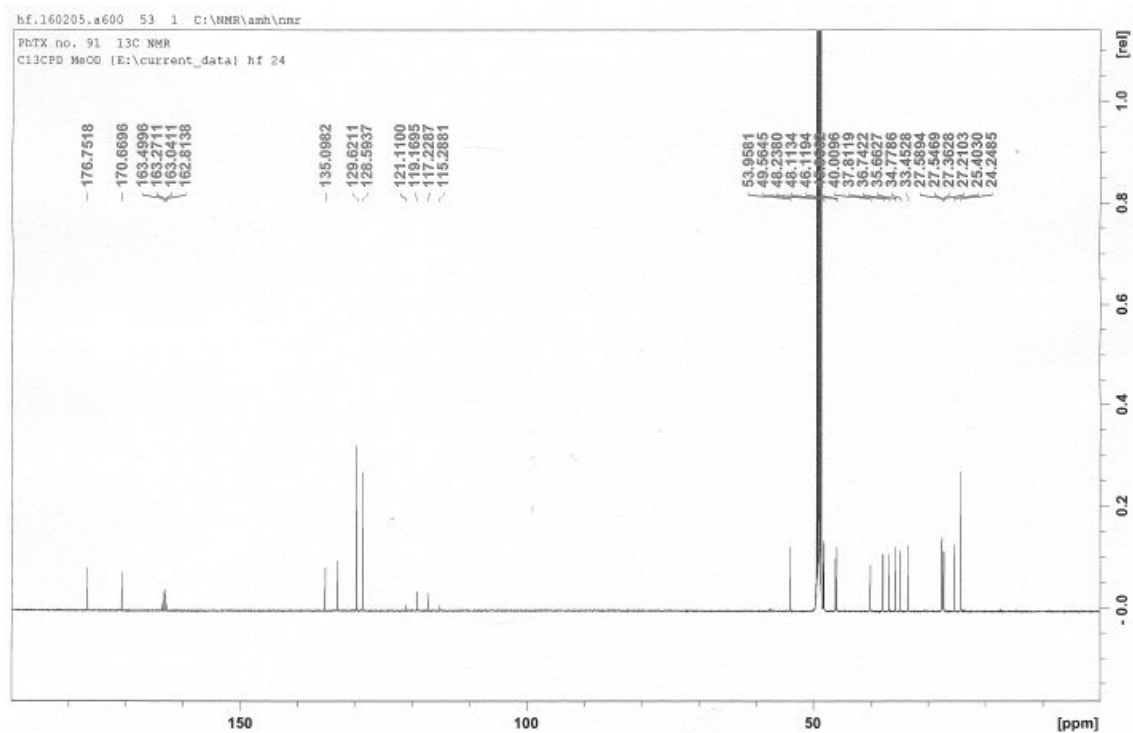

Compound **15**:

$^1\text{H}$  NMR spectrum (600 MHz, methanol- $\text{d}_4$ ):

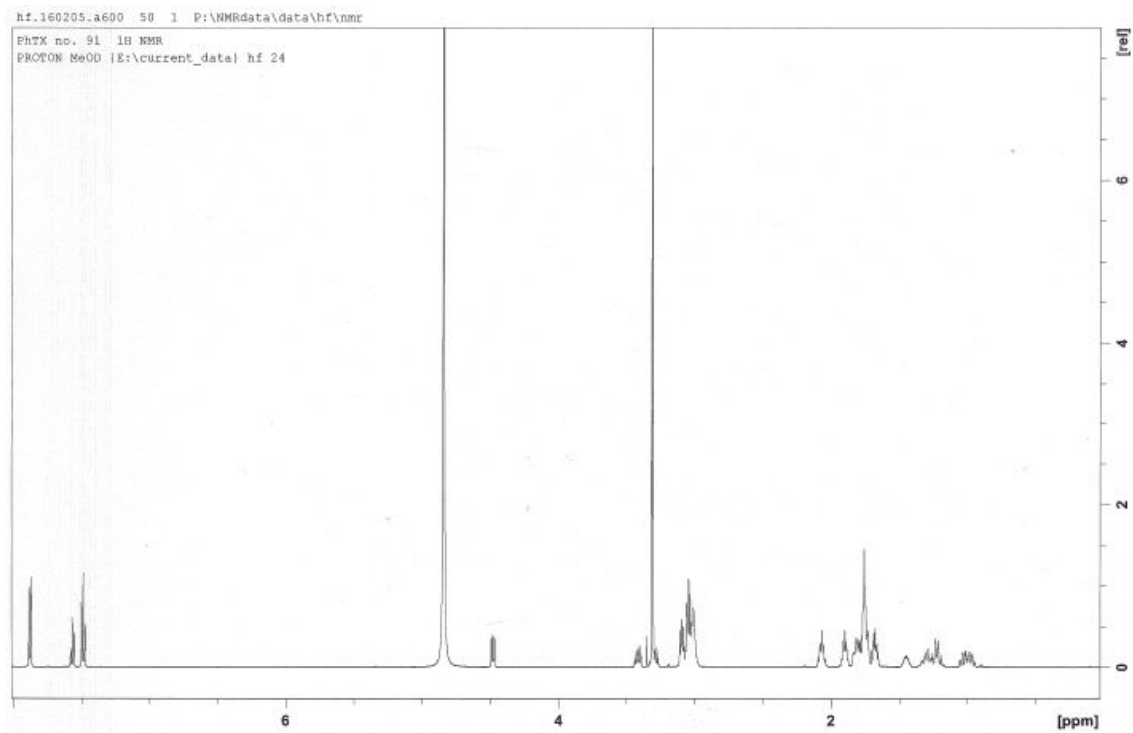



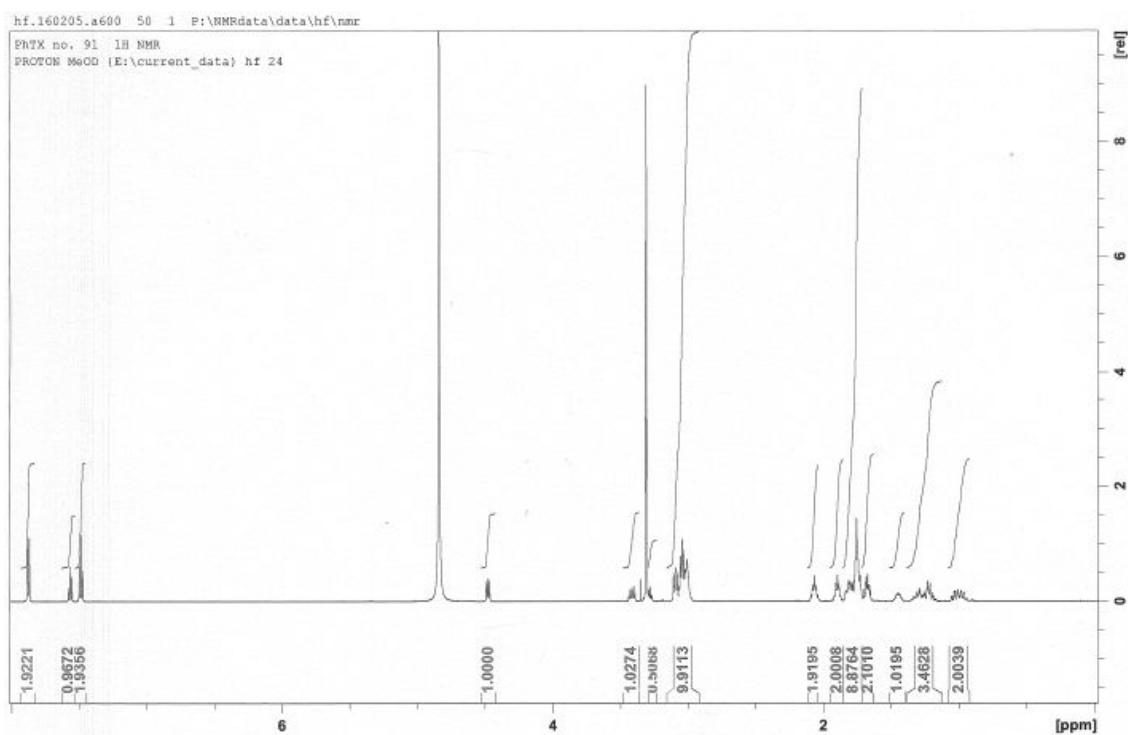

Compound **16**:  $t_R = 20.6$  min (purity: 99.5%). Gradient: 0  $\rightarrow$  100% B over 30 min; B = 95% MeCN + 0.1% TFA. HRMS: calcd for  $C_{31}H_{50}N_5O_2$   $[M + H]^+$  524.39645, found 524.39573;  $\Delta M = 1.3$  ppm.

Analyt. HPLC chromatogram:

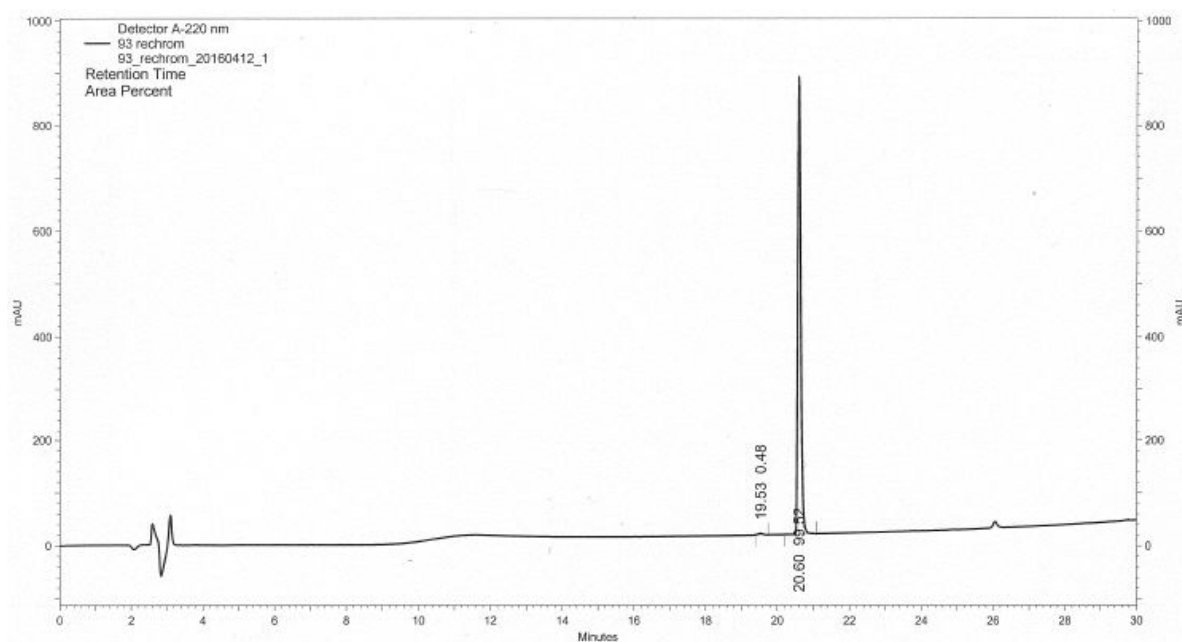

$^{13}\text{C}$  NMR spectrum (150 MHz, methanol- $d_4$ ):

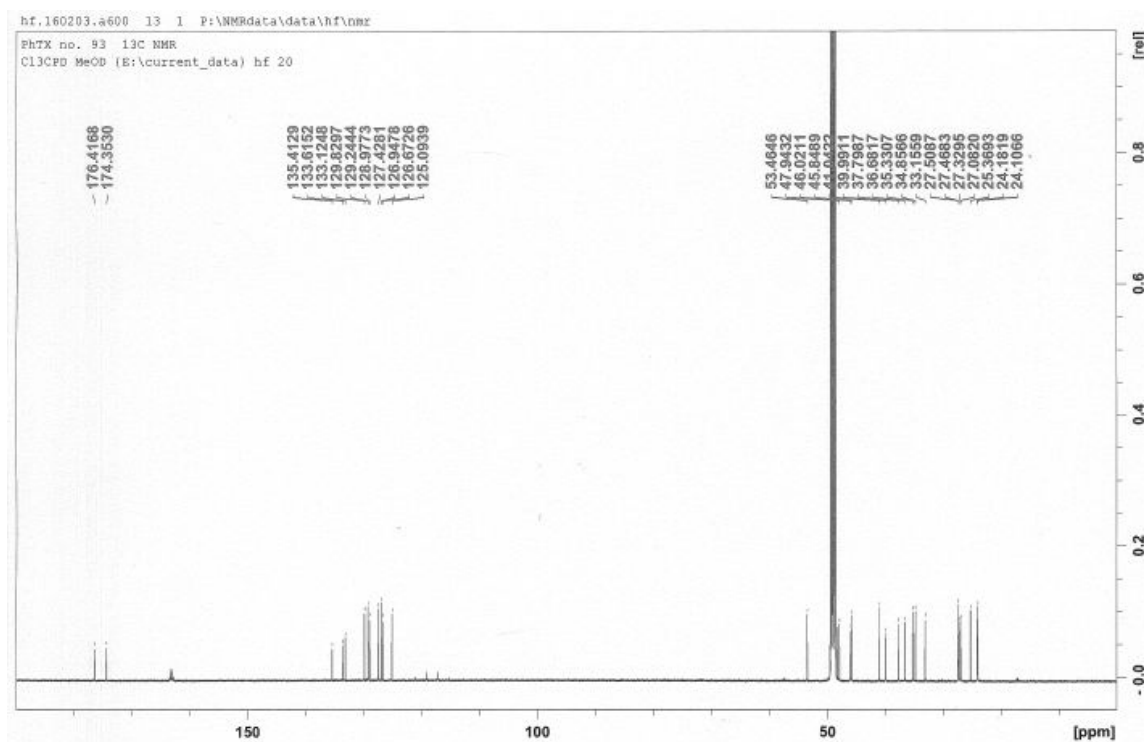

Compound **16**:

$^1\text{H}$  NMR spectrum (600 MHz, methanol- $d_4$ ):

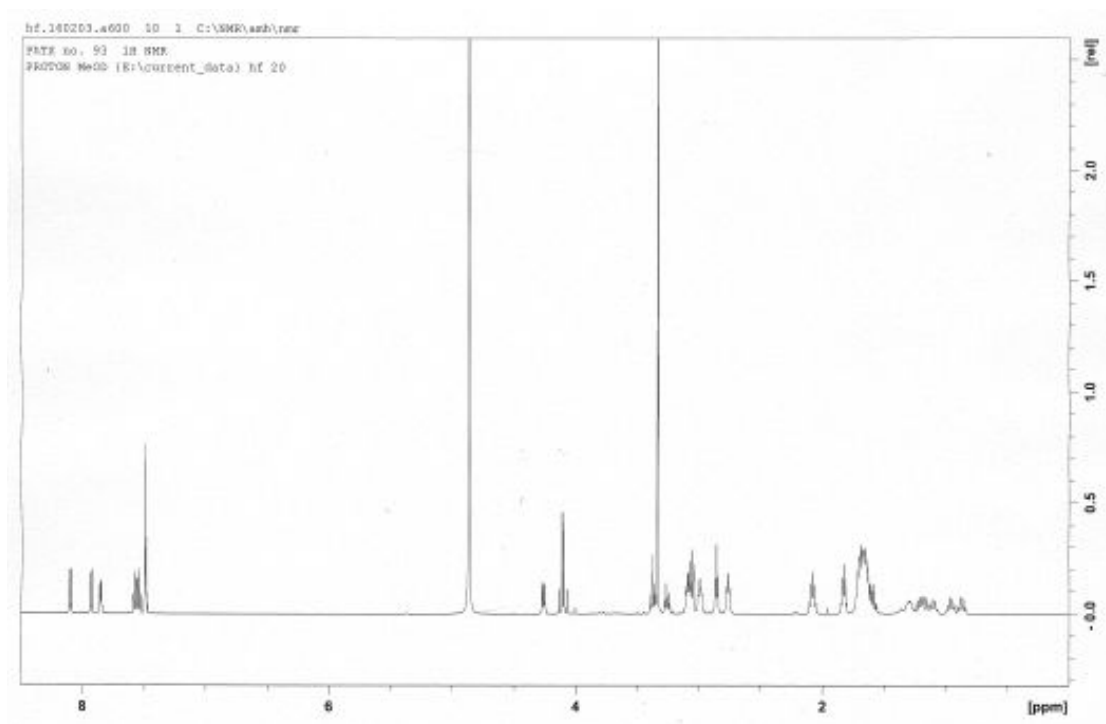

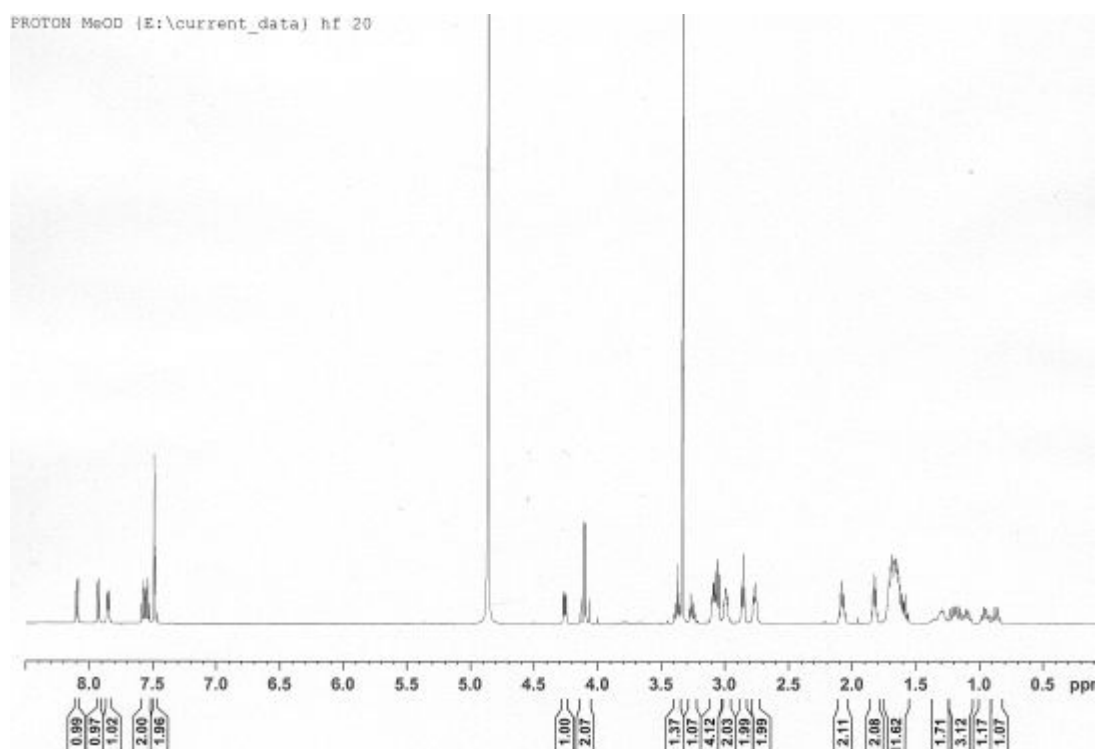

Compound **17**:  $t_R = 20.01$  min (purity: 99.5%). Gradient: 0  $\rightarrow$  100% B over 30 min; B = 95% MeCN + 0.1% TFA. HRMS: calcd for  $C_{28}H_{48}N_5O_2 [M + H]^+$  486.38025, found 486.38021;  $\Delta M = 0.1$  ppm.

Analyt. HPLC chromatogram:

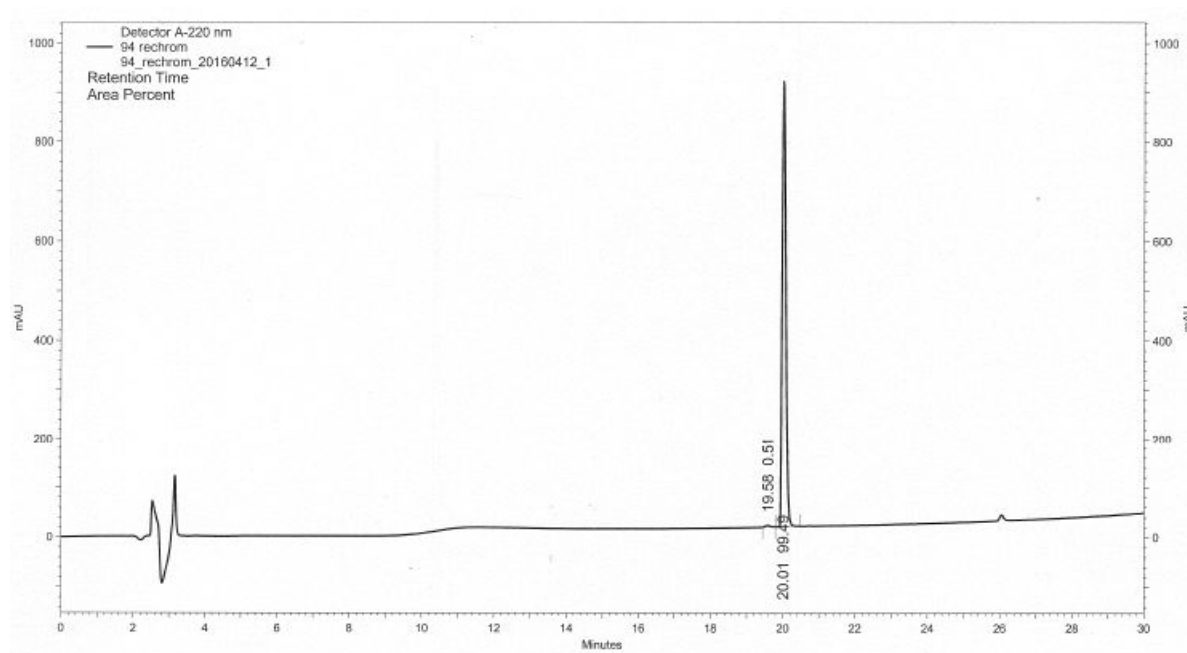

$^{13}\text{C}$  NMR spectrum (150 MHz, methanol- $\text{d}_4$ ):

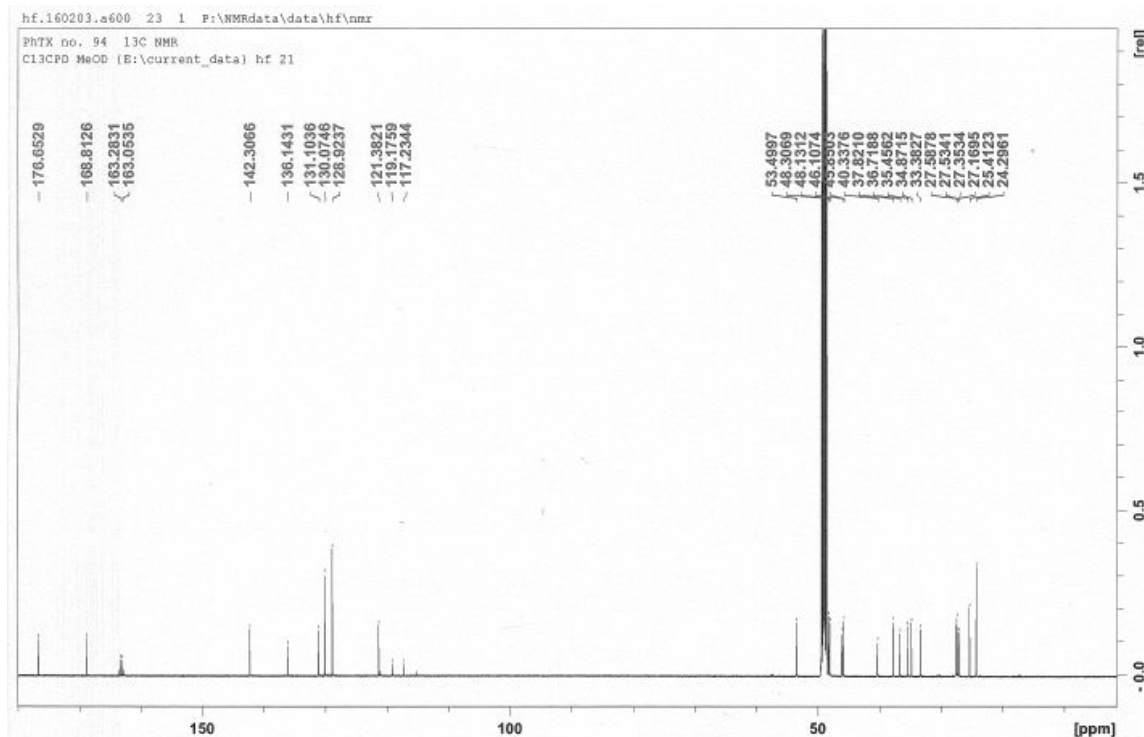

Compound 17:

$^1\text{H}$  NMR spectrum (600 MHz, methanol- $\text{d}_4$ ):

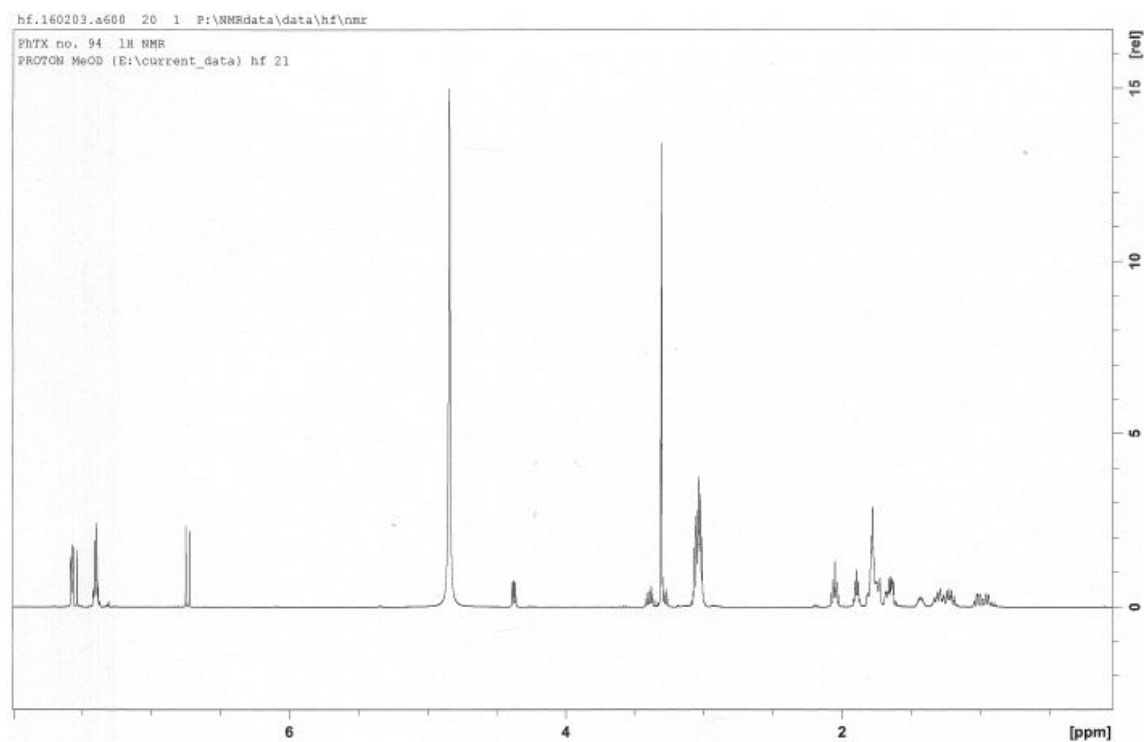

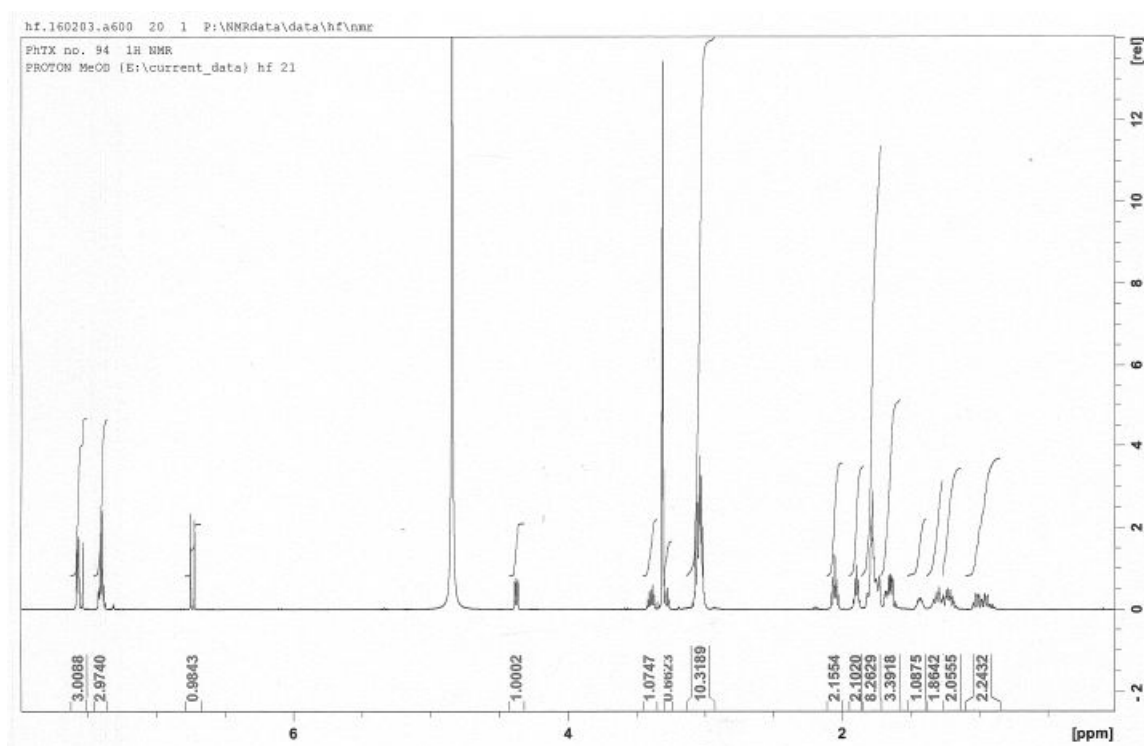

Supplement: Supplementary file 1 [file 15577880]
